# Supplementary material
Source: Springer Nature journal article supplement (https://www.springermedizin.de/resource/supplementary/12958_2006_326_MOESM8_ESM.pdf/9567630)
Supplement: MOESM8 [file 9567630]

**Table-2 Drug or alcohol induced changes in the expression levels of  $\beta_1$  and  $\alpha_5$  integrin subunits in HTR-8/SVneo cells**

| Drug/<br>Alcohol | Treatment<br>Period | Concentration | Integrin<br>Subunit $\beta_1$ | Integrin<br>Subunit $\alpha_5$ |
|------------------|---------------------|---------------|-------------------------------|--------------------------------|
| VPA              | 3h                  | High          | ↓*                            | ↑*                             |
|                  |                     | Low           | —                             | ↑*                             |
|                  | 12h                 | High          | —                             | ↓*                             |
|                  |                     | Low           | ↑                             | ↓                              |
| THA              | 3h                  | High          | ↑*                            | ↑*                             |
|                  |                     | Low           | ↑*                            | ↑*                             |
|                  | 12h                 | High          | ↑*                            | ↑*                             |
|                  |                     | Low           | ↑                             | —                              |
| ALC              | 3h                  | High          | ↑*                            | ↑                              |
|                  |                     | Low           | ↑*                            | ↑*                             |
|                  | 12h                 | High          | ↑*                            | ↑                              |
|                  |                     | Low           | ↑*                            | ↑*                             |

**Arrows** Expression levels of integrin subunit relative to respective control (untreated cells).

\* Significantly different from the respective control at  $p < 0.05$ .

(—) No change from the respective controls.
